# Supplementary material
Source: Royal Society of Chemistry journal article supplement (doi:10.1039/d5md01098e)
Supplement: d5md01098e1.xlsx [file d5md01098e1.xlsx]

## Sheet: Sheet1
		Total		MIC (μM)
		Alkyl C	cLogP	MSSA	CA-MRSA	HA-MRSA	E. faecalis	E. coli	K. pneumoniae	A. baumannii	P. aeruginosa	Lysis20
	BAC		3.01	4	4	32	63	63	8	63	250	125
	Chlorhexidine		0.41	0.5	1	1	4	0.5	1	8	8	125
	Isooct-6,5	17	2	16	32	32	125	125	16	>250	>250	250
	Isooct-6,6	18	2.36	4	8	16	63	63	4	250	250	250
	Isooct-6,8	20	3.08	0.5	1	2	4	4	1	63	32	250
	Isooct-8,5	21	3.32	1	1	1	2	2	1	16	63	125
	Oct-8,5	21	2.94	1	1	2	2	2	1	16	32	125
	Isooct-6,10	22	3.69	0.5	0.5	1	1	1	1	16	8	125
	Isooct-8,6	22	3.59	0.5	0.5	1	1	1	0.5	8	32	63
	Oct-8,6	22	3.32	0.5	0.5	2	2	2	1	8	16	63
	Isooct-8,8	24	4.38	0.5	0.5	2	1	1	1	4	4	16
	Oct-8,8	24	4.13	0.5	0.5	1	1	1	0.5	2	8	16
	Isooct-10,5	25	4.66	1	1	1	1	1	1	1	8	16
	Octenidine	26	4.88	1	0.5	1	1	1	0.5	1	2	8
	Isooct-8,10	26	5.03	1	0.5	1	1	1	1	2	2	8
	Isooct-10,6	26	5.03	1	1	2	2	2	1	2	8	8
	Isooct-11,5	27	5.43	2	1	4	2	2	2	2	8	8
	Isooct-10,8	28	5.68	1	1	2	1	1	1	2	2	4
	Isooct-11,6	28	5.7	1	1	2	4	2	2	2	16	16
	Isooct-12,5	29	5.97	2	2	4	4	8	4	8	32	32
	Isooct-10,10	30	6.38	1	1	2	2	2	2	4	8	8
	Isooct-11,8	30	6.36	1	1	2	2	2	2	4	8	8
	Isooct-12,6	30	6.31	1	1	4	4	4	2	4	32	16
	Isooct-11,10	32	7.07	1	1	2	2	2	2	4	16	8
	Isooct-12,8	32	7.05	2	2	8	8	8	8	8	32	16
	Isooct-14,5	33	7.32	4	4	16	32	16	8	32	250	32
	Isooct-12,10	34	7.75	4	1	4	4	4	4	8	32	8
	Isooct-14,6	34	7.68	4	2	8	16	16	8	16	125	32
	Isooct-14,8	36	8.44	4	4	32	32	32	16	32	125	32
	Isooct-14,10	38	9.15	2	2	8	8	8	8	16	16	8
	Isooct-6,8			0.5	1	2	4	4	1	63	32	250
	Isooct-6,8			0.5	1	2	4	4	1	63	32	250

## Sheet: Table
	A	B	C	D	E	F	G	H	I	J	K	L
1
2
3
Average
	M	N	O	P	Q	R	S	T	U	V	W	X
1
2
3
Average
	Y	Z	AA	AB	AC	AD	AE	AF	AG	AH	AI	AJ
1
2
3
Average
	AK	AL	AM	AN	AO	AP	AQ	AR	AS	AT	AU	AV
1
2
3
Average
	AW	AX	AY	AZ	AAA	AAB	AAC	AAD
1
2
3
Average
